# Supplementary material for: A multi-centre service evaluation of the impact of the COVID-19 pandemic on presentation of newly diagnosed cancers and type 1 diabetes in children in the UK
Source: medRxiv preprint, doi:10.1101/2021.02.09.21251149, version 2 (2021-02-21)
Supplement: Online supplementary material - T1DM data collection form [file 251149_file08.docx]

## **COVID Pandemic study of urgent clinical presentations of childhood malignancy and new cases of childhood diabetes to Children’s Hospitals / Emergency Departments in UK: A Multicentre Quality Improvement project to inform public and professional guidance for children presenting with serious health concerns at the primary secondary care interface**

**Diabetes Mellitus**

**Centre:**_________________________ **Gender**: ☐ Male ☐ Female **Age at diagnosis:** ☐ Under 5 ☐ 5-11 ☐ 12 + **Patient from a BAME background:** ☐ Yes ☐No

- **Initial symptom(s)**

☐ polydipsia ☐ polyuria ☐ thirst ☐ lethargy ☐ weight loss

☐ other _______________________________________________________________

- **Key dates (DD/MM/YYYY)**

Date of first symptom onset: __________________________________ ☐ Not known

Date of first presentation to healthcare: _________________________ ☐ Not known

Date of diagnosis: ___________________________________________ ☐ Not known

Date starting insulin treatment: ________________________________ ☐ Not known

***Establishing the exact date could be difficult. In this situation please approximate as described:***

- *If the exact date can only be specified to the nearest week, please record this by entering the date of the first day of the week (Monday).*
- *If the exact date can only be specified to the nearest month, please record this by entering the first day of the month.*
- *If the information is not available, please select ‘not known*

**Route to diagnosis**

- Was the patient in COVID-19 self-isolation/shielding?

☐ No

☐ Yes ☐ Confirmed case

☐ Possible contact with a confirmed case

☐ Clinical symptoms met

☐ Other ____________________

- Who was the first healthcare professional (HCP) they contacted about the symptom(s):

☐ GP ☐ Emergency doctor ☐ Paediatrician ☐Nurse practitioner ☐ Health visitor
☐ NHS 111 ☐ Other (please specify ____________)

- How many HCP contacts before diagnosis? __________
- Patient's place of care when the definitive test (e.g. capillary/blood glucose) that identified the condition was requested:

☐ Primary care ☐ Outpatient ☐ Inpatient ☐ A&E ☐ Other _______________

- Definitive test:☐ Lab glucose ☐POCT glucose ☐ Other _________________Result: ___________________
- Was this an incidental finding?

☐ No ☐ Yes - asymptomatic ☐ Yes - with non-specific symptoms

- What was the source of referral leading to diagnosis?

| Emergency presentation (A&E) | ☐ Self-referral ☐ GP referral ☐ MIU/Walk In Centre  ☐ Emergency transfer from another hospital  ☐ NHS 111 ☐ Other HCP (please specify) ______________________________ |
| --- | --- |
| GP referral | ☐Routine referral ☐ Urgent referral to general paediatrician  ☐ Urgent referral to specialist diabetic services  ☐ Other ________________________________________ |
| Other | Please specify: ________________ |

- Any other comments about the patient’s journey to diagnosis

_______________________________________________________________________________

_______________________________________________________________________________

- Diabetic ketoacidosis at presentation

☐ No ☐ Yes

Glucose level: ________________

pH at presentation: ________________

Ketones: ________________

Bicarbonate: ________________

GCS at presentation: ________________

Cerebral oedema: ☐ No ☐ Yes

Fluid resuscitation: ☐ No ☐ Yes amount:______________

Ventilation: ☐ No ☐ Yes ______________ days

ITU stay: ☐ No ☐ Yes ______________ days

- **Antibodies:**

Islet cell cytoplasmic antibodies (ICA) ☐ Negative ☐ Positive ☐ Not tested

Glutamic acid decarboxylase antibodies (GAD) ☐ Negative ☐ Positive ☐ Not tested

Insulin autoantibodies (IAA) ☐ Negative ☐ Positive ☐ Not tested

Zinc Transporter 8 antibodies (ZnT8) ☐ Negative ☐ Positive ☐ Not tested

Insulinoma-associated-2 autoantibodies (IA-2) ☐ Negative ☐ Positive ☐ Not tested

Other: ____________________

**Emergency Department**

**Set A: Overall DKA%**

- Number of A&E attendance
- Number of DKA cases

**Set B: Individual data**

Once received the patient list from Endocrinology/diabetes, please extract the following information of individual patient from A&E database:

- PEWS at triage
- Triage category
- Highest level of care required (ward, HDU, PICU)
- Disposal
